# Supplementary material for: Vinca alkaloid drugs promote stress-induced translational repression and stress granule formation
Source: PubMed Central journal article supplement (PMC5058682; doi:10.18632/oncotarget.8728), 2016-04-13
Supplement: oncotarget-07-30307-s001.pdf [file oncotarget-07-30307-s001.pdf]

# Vinca alkaloid drugs promote stress-induced translational repression and stress granule formation

## Supplementary Material

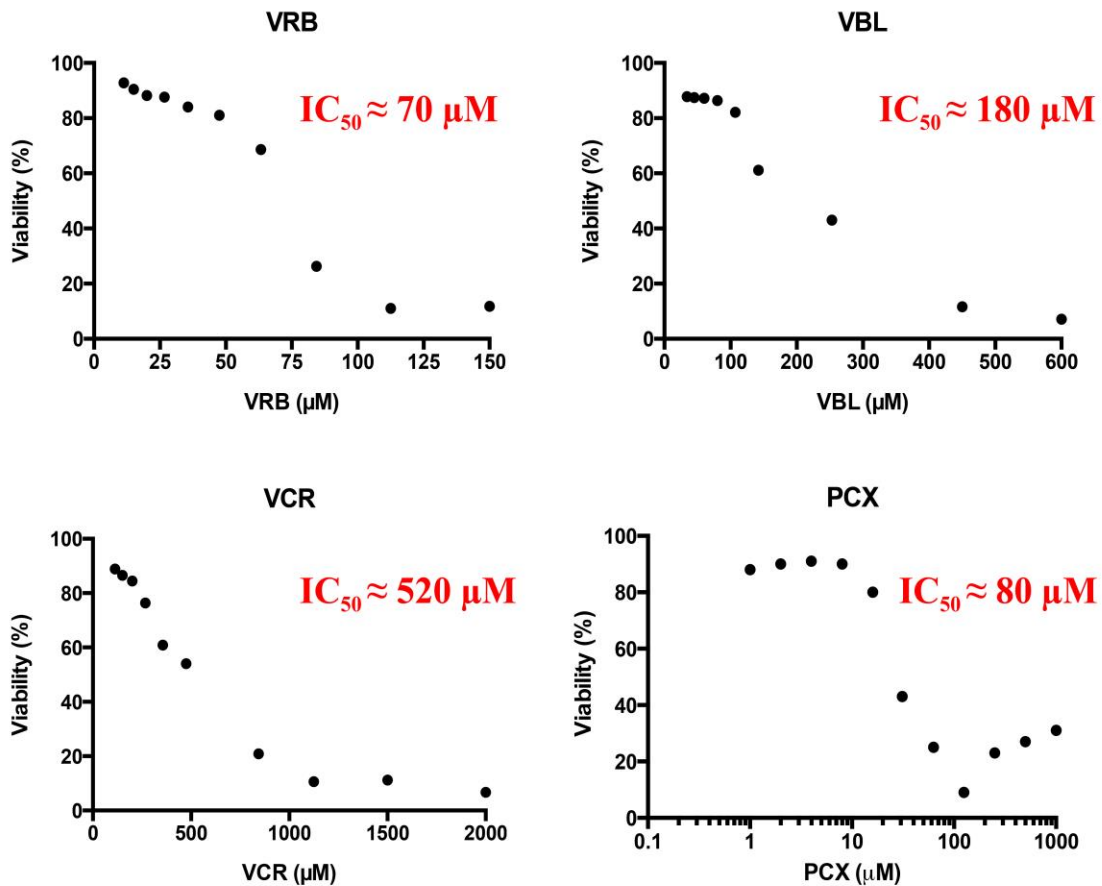

**Figure S1**

**Supplementary Figure 1.** Determination of the half maximal inhibitory concentrations ( $\text{IC}_{50}$ ) of VAs and PCX in U2OS cells.

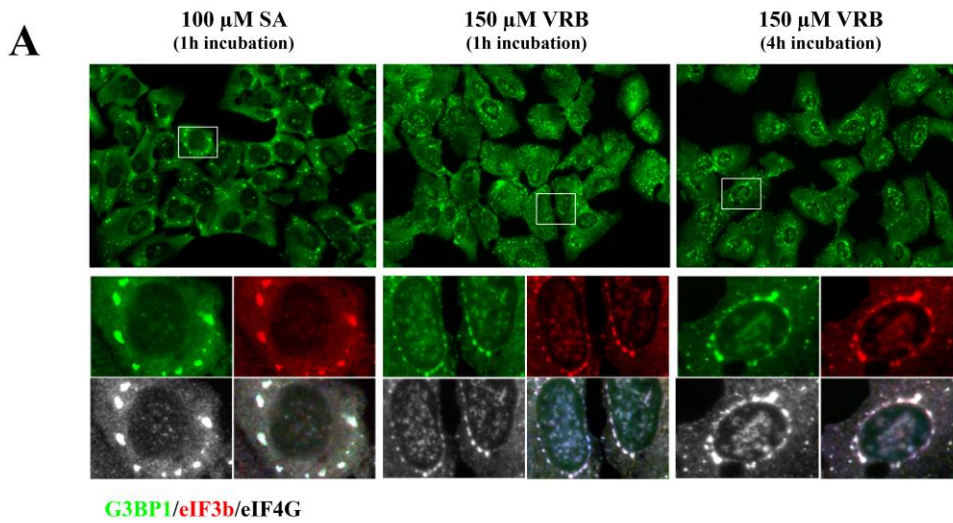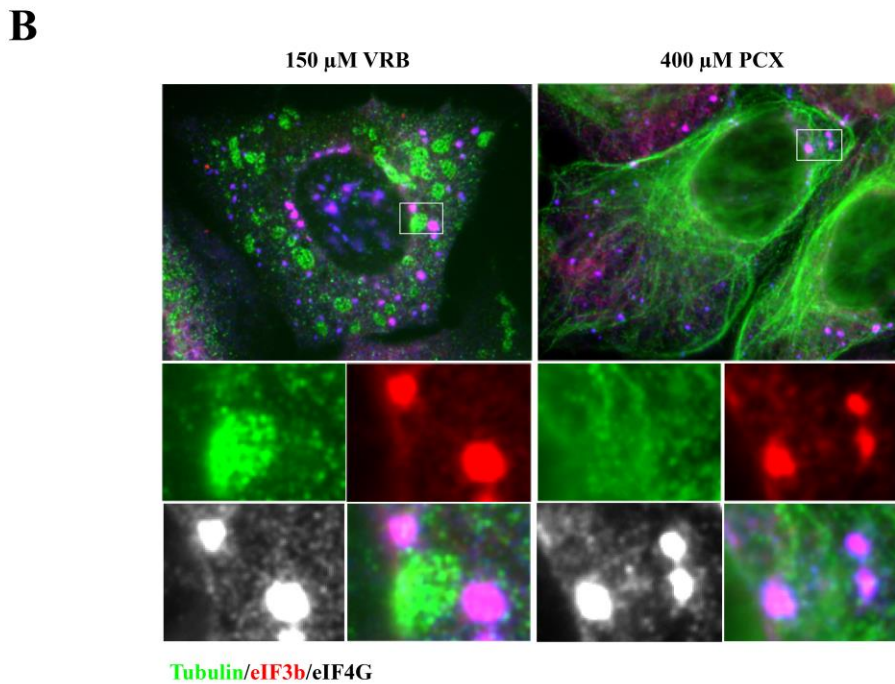

## Figure S2

**Supplementary Figure 2.** VRB promotes SG formation in U2OS cells. Cells were treated with SA (100  $\mu$ M) for 1 hour or VRB (150  $\mu$ M) for 1 or 4 hours. SG were visualized by staining with G3BP1 (green), eIF3b (red) and eIF4G (blue, shown as gray) antibodies. **B:** VRB disrupts and PCX stabilizes microtubule networks. U2OS were treated with 150  $\mu$ M VRB or 400  $\mu$ M PCX for 1 hour. Cells were stained for the microtubule marker  $\beta$ -Tubulin (green), SG markers eIF3b (red) and eIF4G (blue, shown as gray).

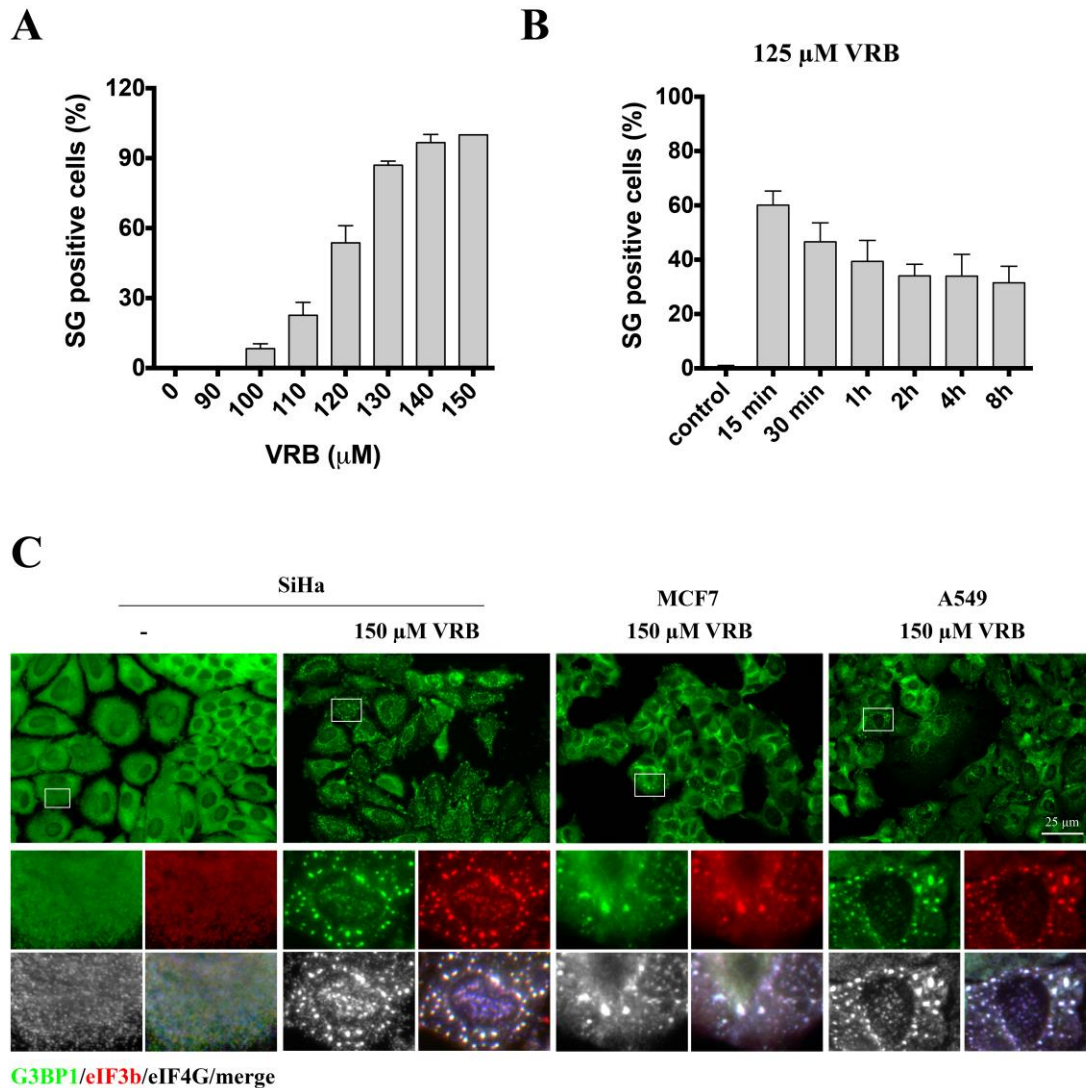

**Figure S3**

**Supplementary Figure 3.** VRB promotes SG formation in various cells. **A:** Percentage of SG-positive U2OS cells under various concentrations of VRB (0-150  $\mu\text{M}$ ) was determined by quantifications of G3BP1-positive SGs. **B:** VRB induces rapid SG formation in U2OS cells. **C:** VRB-induced SG formation in various cancer cell lines. Cervical (SiHa), breast (MCF7) and lung (A549) cancer cell lines were treated with 150  $\mu\text{M}$  of VRB. Untreated SiHa cells also shown (-) as a control. SGs were visualized by staining with markers G3BP1 (green), eIF3b (red) and eIF4G (blue, shown as gray).

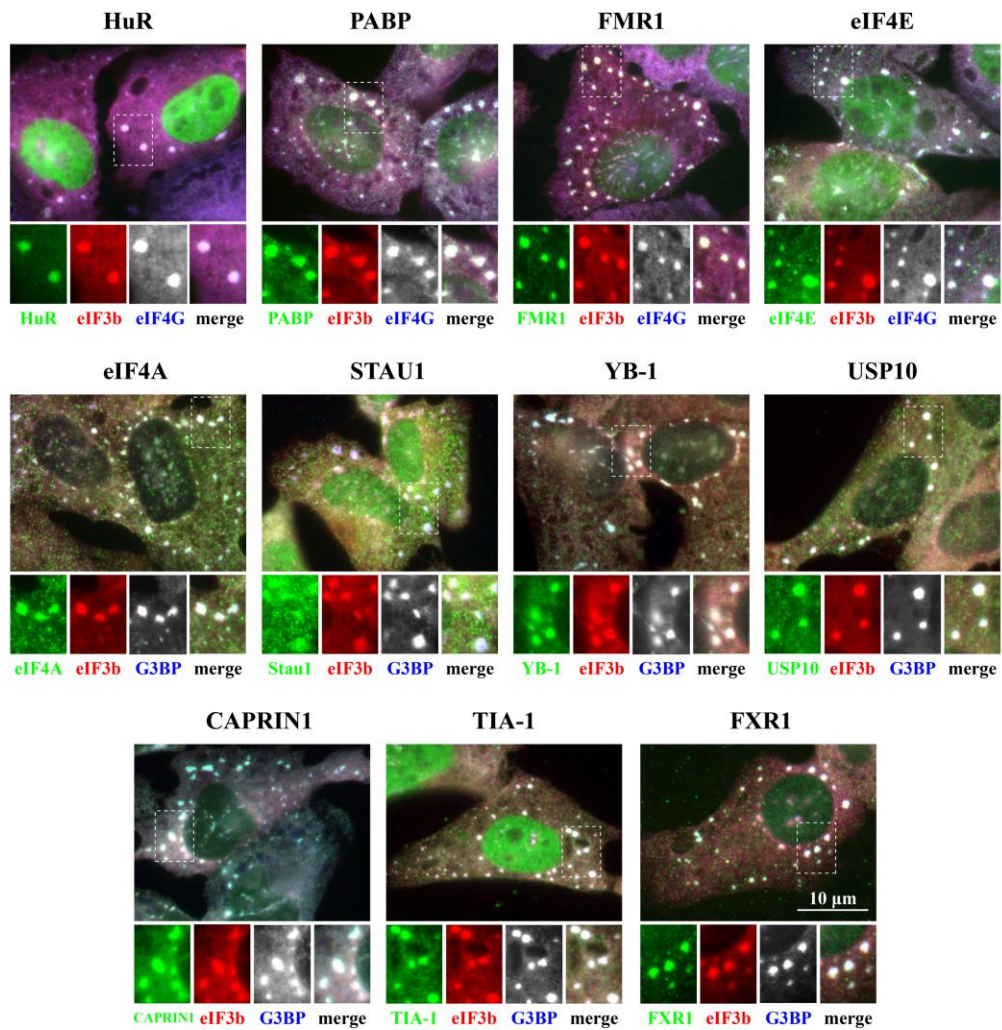

**Figure S4**

**Supplementary Figure 4.** Composition of VRB-induced SGs. Composition of VRB-induced SGs was determined by co-localization of SG-associated proteins HuR, PABP, FMR1, eIF4E, eIF4A, STAU1, YB-1, USP10, CAPRN1, TIA-1 and FXR1 (all in green) with canonical SG markers eIF3b (red), eIF4G or G3BP1 (blue, shown as grey) .

**A**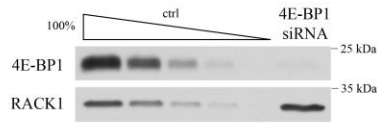**B**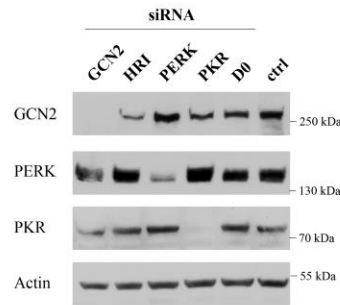**C**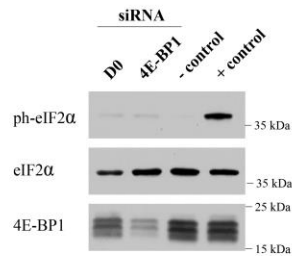

## Figure S5

**Supplementary Figure 5.** Efficiency of knock down of 4E-BP1 and eIF2 $\alpha$  kinases. **A-B:** Whole cell lysates from U2OS cells treated with control siRNA (ctrl) and 4E-BP1 siRNA (**A**) or two control siRNAs (Do and Ctrl) and eIF2 $\alpha$  -specific kinases (PERK, PKR, GCN2 and HRI) (**B**) were processed for Western Blotting using 4E-BP1 (**A**) or PERK-, PKR-, GCN2 or HRI- (**B**) specific antibodies. Dilution series of lysates from control siRNA-treated cells (100%, 50%, 25% and 12.5%) are used (triangle) to determine the relative efficiency of 4E-BP1 depletion (**A**). RACK1 serves as loading control (**A**). Actin serves as loading control for eIF2 $\alpha$  kinases depletion (**B**). **C:** Evidence that 4E-BP1 depletion does not affect eIF2 $\alpha$  phosphorylation. Depletion of 4E-BP1 was done as described in S5A. siRNA treatment with control siRNA (D0) was used as control for non-specific effects. No treatment (- Control) or treatment with sodium arsenite (+Control) was used for the detection of eIF2 $\alpha$  phosphorylation levels. Non-phosphorylated form of eIF2 $\alpha$  served as a loading and reference controls.
